# Supplementary material for: Alternative Thermodynamic Pathway for Producing Neodymium from Oxide Through Molten Solution Non-Ideality and Hydride Precipitation
Source: Research Square preprint supplement (doi:10.21203/rs.3.rs-6916106/v1), 2025-07-16
Supplement: Supplementary file 1 [file 0ea04de6f17e0ca0cdde57f1.xlsx]

## Sheet: Sheet1
Reduction Experiment	Initial Mg Mass (g)	Initial Nd2O3 Mass (g)	Initial Total Mass (g)	Final Total Mass (g)	Mg Mass Evaporated (g)	Mg Mass Corrected for Evaporation (g)	Moles Mg Initial	Moles Nd2O3 Initial	Initial Molar Reactant Ratio (Moles Nd2O3 / 3 Moles Mg)	Nd Concentration (wt. %)	Nd Concentration from ICP (Mole Fraction)	Degree of Reduction (%)
1	8.0012	0.4998	24.4475	23.6242	0.8233	7.1779	0.295326	0.00148538	0.0150889	5.18	0.00912137	0.902649
2	8.0005	2.0003	29.0655	28.8938	0.1717	7.8288	0.322107	0.00594478	0.0553678	17.35	0.0341641	0.910013
3	8.0007	3.5002	28.3232	27.8732	0.45	7.5507	0.310664	0.0104024	0.100453	28.48	0.0628807	0.910335
4	8.0007	4.9999	30.1504	30.0113	0.1391	7.8616	0.323456	0.0148594	0.137819	37.87	0.0931415	0.96863
5	8.0003	6.5006	31.6054	31.3973	0.2081	7.7922	0.320601	0.0193194	0.18078	45.53	0.123459	0.964826
Hydride Precipitation Experiment	H2 Flowrate (mL/min)	Ar Flowrate (mL/min)	Total Pressure (atm)	H2 Partial Pressure (atm)	Uncertainty Lower %	Uncertainty Upper %	Nd Concentration (wt. %)	Nd Concentration from ICP (Mole Fraction)
1	505	500	1.024	0.514547	0.00995074	0.00975467	9	0.016392
2	600	400	0.995	0.597	0.00673401	0.00660066	9.2	0.0167865
3	700	300	1.012	0.7084	0.004329	0.00424328	7.89	0.0142284
4	800	200	1.015	0.812	0.00252525	0.00247525	6.45	0.0114844
5	900	100	1.027	0.9243	0.00112233	0.00110011	6.05	0.0107345
6	1000	0	1.005	1.005	0	0	6.72	0.0119936
